# Supplementary material for: Xenon for tunnelling analysis of the efflux pump component OprN
Source: PubMed Central journal article supplement (PMC5590881; doi:10.1371/journal.pone.0184045), 2017-09-08
Supplement: pone.0184045.s001.pdf [file pone.0184045.s001.pdf]

S1 Table The xenon sites in OprN -  $\alpha$  domain (at 20 bar)

| Site Label / subunit | Refined occupancy (%) / height in initial anomalous map ( $\sigma$ ) | Location                  | Distances ( $\text{\AA}$ )...residue                                                                                                                               |                                                                                                                                                                    |
|----------------------|----------------------------------------------------------------------|---------------------------|--------------------------------------------------------------------------------------------------------------------------------------------------------------------|--------------------------------------------------------------------------------------------------------------------------------------------------------------------|
| Xe 503 / A           | 100 / 31.0                                                           | site M1 on axis (iris)    | 3.94 ...CD1 Leu 405 A<br>3.96 ...CD2 Leu 405 B<br>3.88 ...CD1 Leu 405 C<br>3.63 ...OD1 Asp 409 A<br>3.81 ...OD1 Asp 409 B                                          | 3.66 ...OD1 Asp 409 C<br>3.78 ...NH1 Arg 412 A<br>4.07 ...NH1 Arg 412 B<br>4.09 ...NH1 Arg 412 C                                                                   |
| Xe 504 / A           | 30 / 7.0                                                             | Site S1 intra-subunit A   | 3.84 ...CA Ala 201 A<br>3.92 ...CB Gln 177 A<br>4.11 ...CG Arg 204 A<br>4.76 ...CD1 Leu 408 A                                                                      | 3.79 ...O Ala 201 A<br>3.85 ...O Gln 177 A<br>4.50 ...N Arg 181 A<br>4.23 ...CZ Phe 404 A                                                                          |
| Xe 506 / B           | 30 / 6.3                                                             | Site S1 intra-subunit B   | 3.78 ...CB Ala 201 B<br>3.78 ...CB Gln 177 B<br>3.99 ...CG Arg 204 B<br>3.90 ...CB Ser 180 B<br>3.18 ...OE1 Glu 411 B                                              | 3.58 ...O Ala 201 B<br>4.05 ...CG Gln 177 B<br>4.46 ...N Arg 181 B<br>4.47 ...CZ Phe 404 B<br>4.57 ...OE2 Glu 411 B                                                |
| Xe 505 / C           | 30 / 4.9                                                             | Site S1 intra-subunit C   | 3.79 ...CB Ala 201 C<br>3.74 ...CB Gln 177 C<br>4.16 ...CG Arg 204 C<br>4.23 ...CB Ser 180 C<br>3.31 ...OE1 Glu 411 C<br>3.47 ...O Gln 177 C                       | 3.64 ...O Ala 201 C<br>3.95 ...CG Gln 177 C<br>4.49 ...N Arg 181 C<br>4.19 ...CZ Phe 404 C<br>4.45 ...CD Glu 411 C                                                 |
| Xe 505 / A           | 45 / 12.5                                                            | Site S2 inter-subunit A/C | 3.66 ...CA Gln 214 A<br>4.06 ...C Pro 213 A<br>3.82 ...CB Lys 371 C<br>4.10 ...CD Arg 375 C<br>4.19 ...CB Ala 217 A                                                | 3.49 ...OE1 Gln 214 A<br>3.92 ...O Pro 213 A<br>3.67 ...CG Arg 372 C<br>4.37 ...CB Arg 375 C<br>3.32 ...O HOH 683 C                                                |
| Xe 508 / A           | 35 / 9.5                                                             | Site S2 inter-subunit A/B | 3.59 ...CA Gln 214 B<br>4.22 ...C Pro 213 B<br>4.22 ...CB Lys 371 A<br>3.99 ...CD Arg 375 A<br>4.25 ...CB Ala 217 B                                                | 3.49 ...OE1 Gln 214 A<br>3.92 ...O Pro 213 A<br>3.67 ...CG Arg 372 C<br>4.45 ...CB Arg 375 A<br>3.38 ...O HOH 654 A                                                |
| Xe 509 / B           | 40 / 9.0                                                             | Site S2 inter-subunit B/C | 3.65 ...CA Gln 214 C<br>4.03 ...CB Gln 214 C<br>4.25 ...C Pro 213 C<br>4.10 ...CB Lys 371 B<br>4.00 ...CD Arg 375 B<br>4.29 ...CB Ala 217 C<br>4.01 ...C Lys 371 B | 4.00 ...CG Gln 214 C<br>4.30 ...OE1 Gln 214 C<br>4.13 ...O Pro 213 C<br>3.69 ...CG Arg 372 B<br>4.35 ...CB Arg 375 B<br>3.38 ...O HOH 689 B<br>3.72 ...N Arg 372 B |
| Xe 507 / B           | 25 / 7.5                                                             | Site S3 intra-subunit B   | 3.17 ...CG Leu 149 B<br>3.82 ...CD2 Leu 51 B<br>4.31 ...CD2 Leu 57 B<br>2.95 ...CD1 Leu 149 B<br>4.37 ...N Ile 150 B                                               | 4.10 ...CB Ser 50 B<br>3.41 ...OG Ser 50 B<br>4.08 ...O Ser 50 B<br>4.73 ...CG1 Ile 150 B<br>2.94 ...CB Leu 149 B                                                  |
| Xe 506 / C           | 23 / 7.6                                                             | Site S3 intra-subunit C   | 3.67 ...CG Leu 149 C<br>4.12 ...CD2 Leu 51 C<br>4.12 ...CD1 Leu 57 C<br>3.78 ...CD1 Leu 149 C<br>4.30 ...N Ile 150 C<br>4.23 ...O Ser 50 C<br>4.53 ...CG Asn 54 C  | 4.08 ...CB Ser 50 C<br>3.23 ...OG Ser 50 C<br>4.20 ...CG Leu 57 C<br>4.73 ...CG1 Ile 150 C<br>3.09 ...CB Leu 149 C<br>4.24 ...CB Asn 54 C<br>4.33 ...C Ser 50 C    |
