# Supplementary material for: Xenon for tunnelling analysis of the efflux pump component OprN
Source: PubMed Central journal article supplement (PMC5590881; doi:10.1371/journal.pone.0184045), 2017-09-08
Supplement: pone.0184045.s002.pdf [file pone.0184045.s002.pdf]

S2 Table The xenon sites in OprN -  $\beta$  barrel domain

| Site Label / subunit | Refined occupancy (%) / height in initial anomalous map ( $\sigma$ ) | Location                           | Distances ( $\text{\AA}$ )...residue                                                                              |                                                                                               |
|----------------------|----------------------------------------------------------------------|------------------------------------|-------------------------------------------------------------------------------------------------------------------|-----------------------------------------------------------------------------------------------|
| Xe 506 / A           | 35 / 5.7                                                             | $\beta$ -domain, inter-subunit A/C | 4.30 ...CB Ser 84 A<br>4.15 ...CA Arg 85 A<br>4.61 ...CB Ala 86 A<br>4.27 ...CG1 Ile 323 C                        | 4.56 ...CB Trp 325 C<br>4.07 ...O Ile 323 C<br>3.61 ...OG Ser 84 A                            |
| Xe 507 / A           | 20 / 4.9                                                             | $\beta$ -domain, intra-subunit A   | 4.09 ...CB Leu 299 A<br>4.07 ...CB Ser 114 A<br>5.09 ...CG1 Val 82 A                                              | 4.75 ...N Leu 299 A<br>4.60 ...OG Ser 114 A                                                   |
| Xe 501 / B           | 45 / 9.8                                                             | $\beta$ -domain, intra-subunit B   | 4.32 ...CG1 Ile 309 B<br>4.62 ...CD2 Tyr 108 B<br>4.10 ...CB Leu 110 B<br>4.03 ...CB Ala 86 B<br>4.59 ...Xe 502 B | 4.51 ...CG2 Ile 309 B<br>4.70 ...CB Tyr 108 B<br>4.69 ...CD1 Leu 110 B<br>4.34 ...CA Ala 86 B |
| Xe 502 / B           | 35 / 8.1                                                             | $\beta$ -domain, inter-subunit A/B | 4.39 ...CD1 Ile 323 A<br>4.48 ...C Pro 321 A<br>4.65 ...CG Pro 321 A<br>4.19 ...CA Ser 87 B                       | 4.35 ...CG1 Ile 323 A<br>4.47 ...CB Pro 321 A<br>4.33 ...CB Ala 86 B<br>4.59 ...Xe 501 B      |
| Xe 503 / B           | 35 / 5.3                                                             | $\beta$ -domain, inter-subunit A/B | 4.56 ...CB Ala 86 B<br>4.42 ...C Arg 85 B<br>4.31 ...N Arg 85 B<br>4.45 ...CB Ser 84B                             | 4.50 ...CG2 Ile 323 A<br>4.52 ...CA Arg 85 B<br>4.51 ...C Ser 84 B<br>4.49 ...CB Trp 325 A    |
| Xe 501 / C           | 22 / 6.4                                                             | $\beta$ -domain, intra-subunit C   | 4.29 ...CG1 Val 293 C<br>4.48 ...CD1 Leu 295 C<br>3.99 ...CB Plm 501 A *                                          | 4.49 ...CD2 Leu 118 C<br>4.38 ...CB Pro 321 C                                                 |
| Xe 507 / C           | 25 / 5.5                                                             | tunnel <sup>a</sup>                | 3.75 ...CG Arg 225 C<br>4.47 ...CD Gln 159 C<br>4.18 ...CA Ala 222 C                                              | 4.26 ...CB Arg 225 C<br>4.42 ...CB Ala 222 C<br>3.15 ...O HOH 761 C                           |
| Xe 508/ C            | 20 / 3.7                                                             | $\beta$ -domain, inter-subunit B/C | 4.41 ...CB Trp 325 B<br>4.53 ...CG2 Ile 323 B<br>4.52 ...C Arg 85 C<br>4.41 ...CB Ser 84 C                        | 4.68 ...CC PLM 504 B<br>4.60 ...CB Ala 86 C<br>4.60 ...CA Arg 85 C<br>3.62 ...OG Ser 84 C     |

<sup>a</sup> This xenon is located on the inner bank of the tunnel, at the level of the buoy domain.
