# Supplementary material for: Xenon for tunnelling analysis of the efflux pump component OprN
Source: PubMed Central journal article supplement (PMC5590881; doi:10.1371/journal.pone.0184045), 2017-09-08

S2 Fig A: The His-tag on one monomer at left (blue C chain), the  $\beta$ -OG molecule (yellow C chain), the nickel atom (green sphere) and a xenon (S3 site - pink sphere), are shown. They are observed parallel to the 136-146 helix in the buoy domain, and are responsible of breaking the three-fold symmetry at this level of the trimer. B: Crystal packing of OprN in the I4 space group showing the perpendicular interaction of two channels responsible of the non-equivalence observed at site S3.

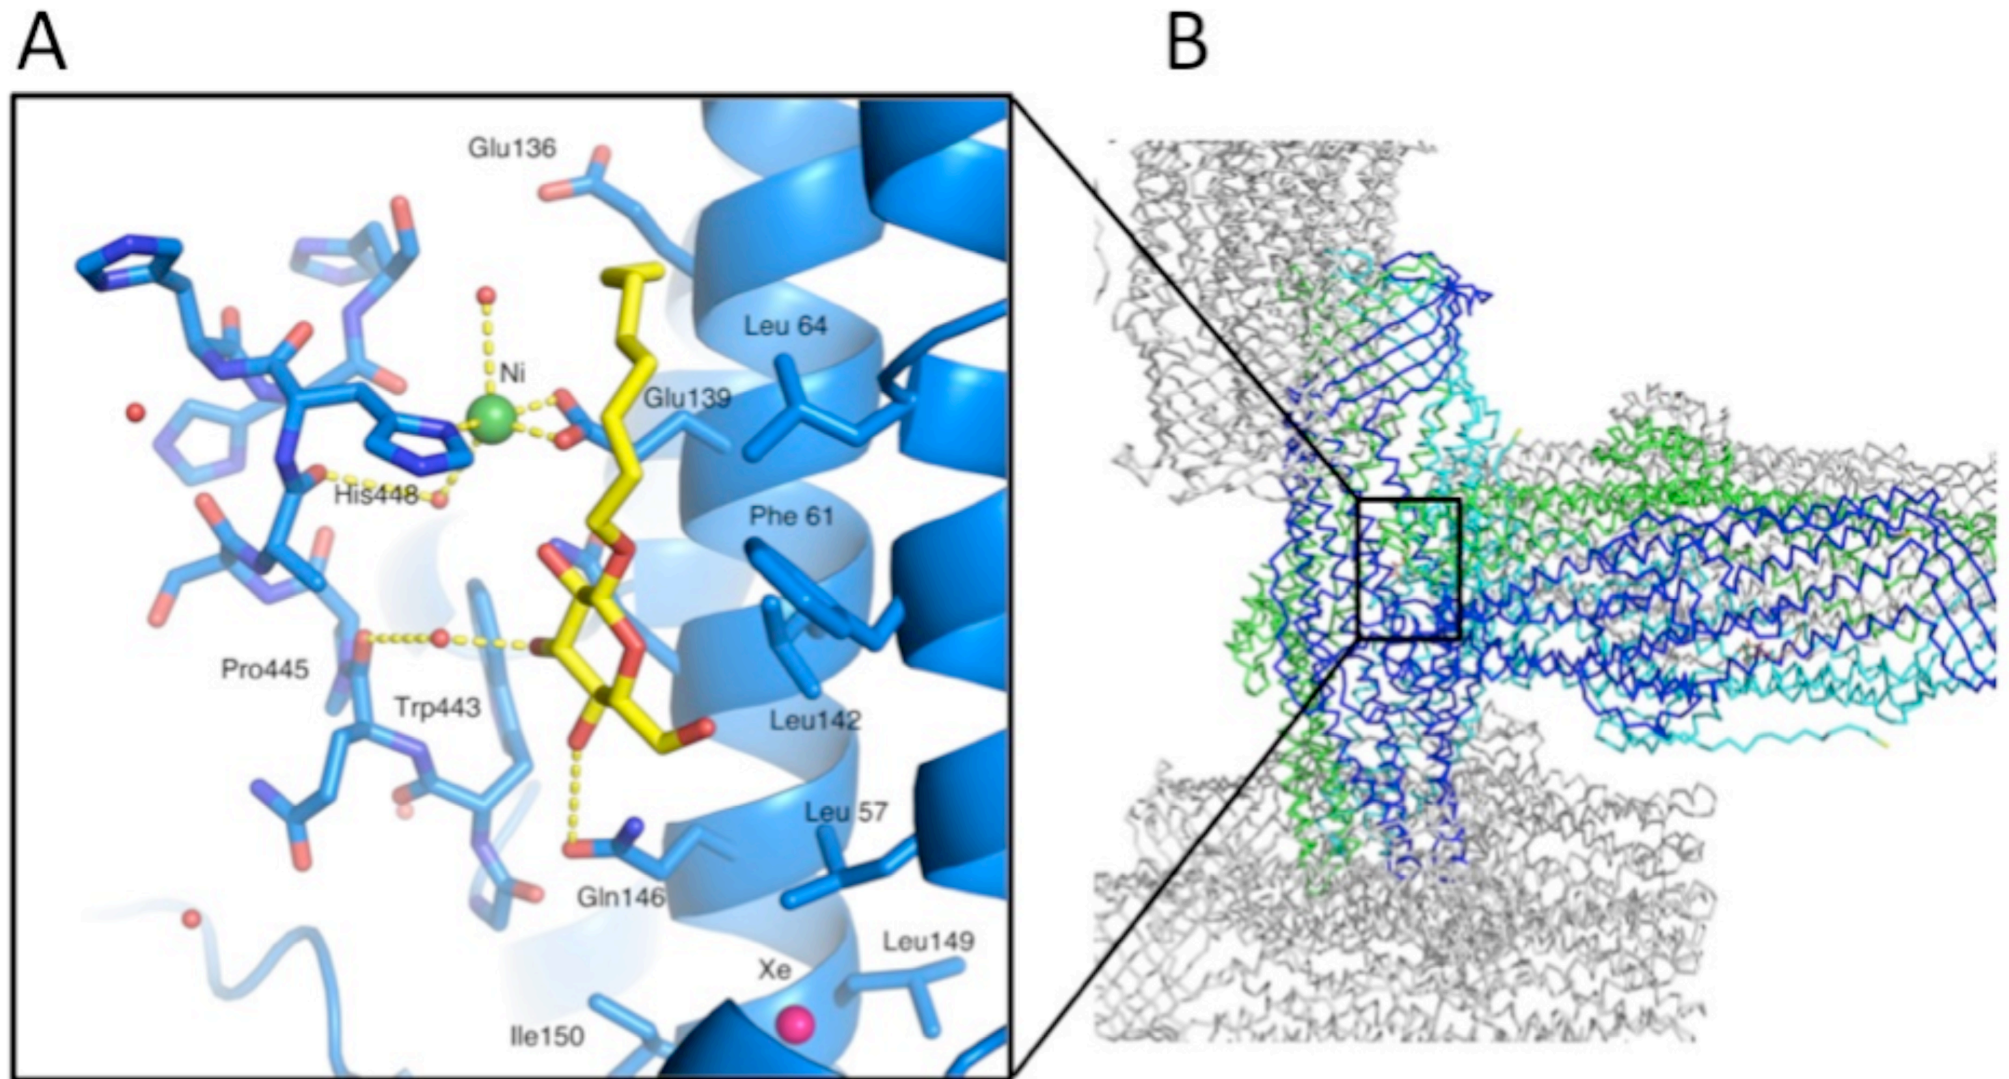

Supplement: pone.0184045.s004.pdf [file pone.0184045.s004.pdf]
