# Supplementary material for: Xenon for tunnelling analysis of the efflux pump component OprN
Source: PubMed Central journal article supplement (PMC5590881; doi:10.1371/journal.pone.0184045), 2017-09-08

S3 Fig **OprN xenon sites**. The 2Fo-Fc maps are drawn at electron density greater than  $2.5 \sigma$  the map average. (**A**: site M1, **B**: one of the S1 sites at the same level). **C** and **D**: The two secondary S2 and S3 sites in subunit B.

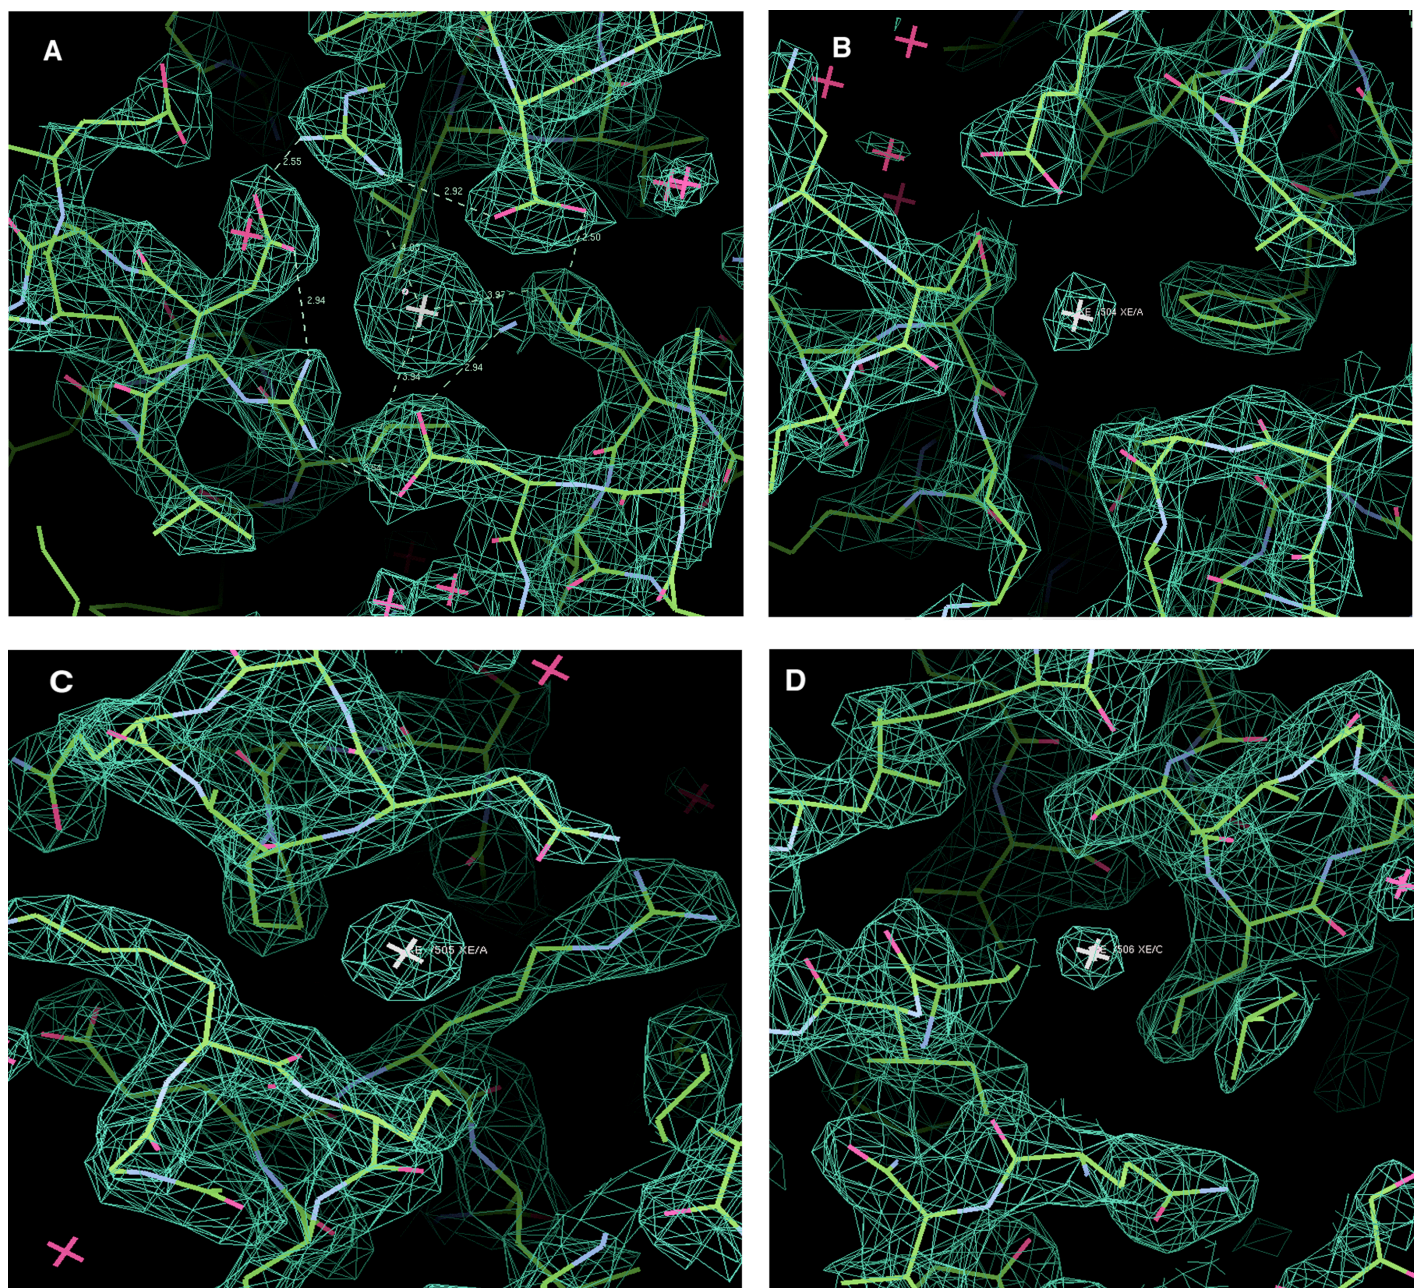

Supplement: pone.0184045.s005.pdf [file pone.0184045.s005.pdf]
