# Supplementary material for: Xenon for tunnelling analysis of the efflux pump component OprN
Source: PubMed Central journal article supplement (PMC5590881; doi:10.1371/journal.pone.0184045), 2017-09-08

S4 Fig **Three xenon sites lining the periphery of the hydrophobic  $\beta$ -barrel domain.** The 2Fo-Fc map is contoured at  $2.5 \sigma$ . Top: site Xe 503B, lower left: Xe 502B and lower right: Xe 501B (see Table S2).

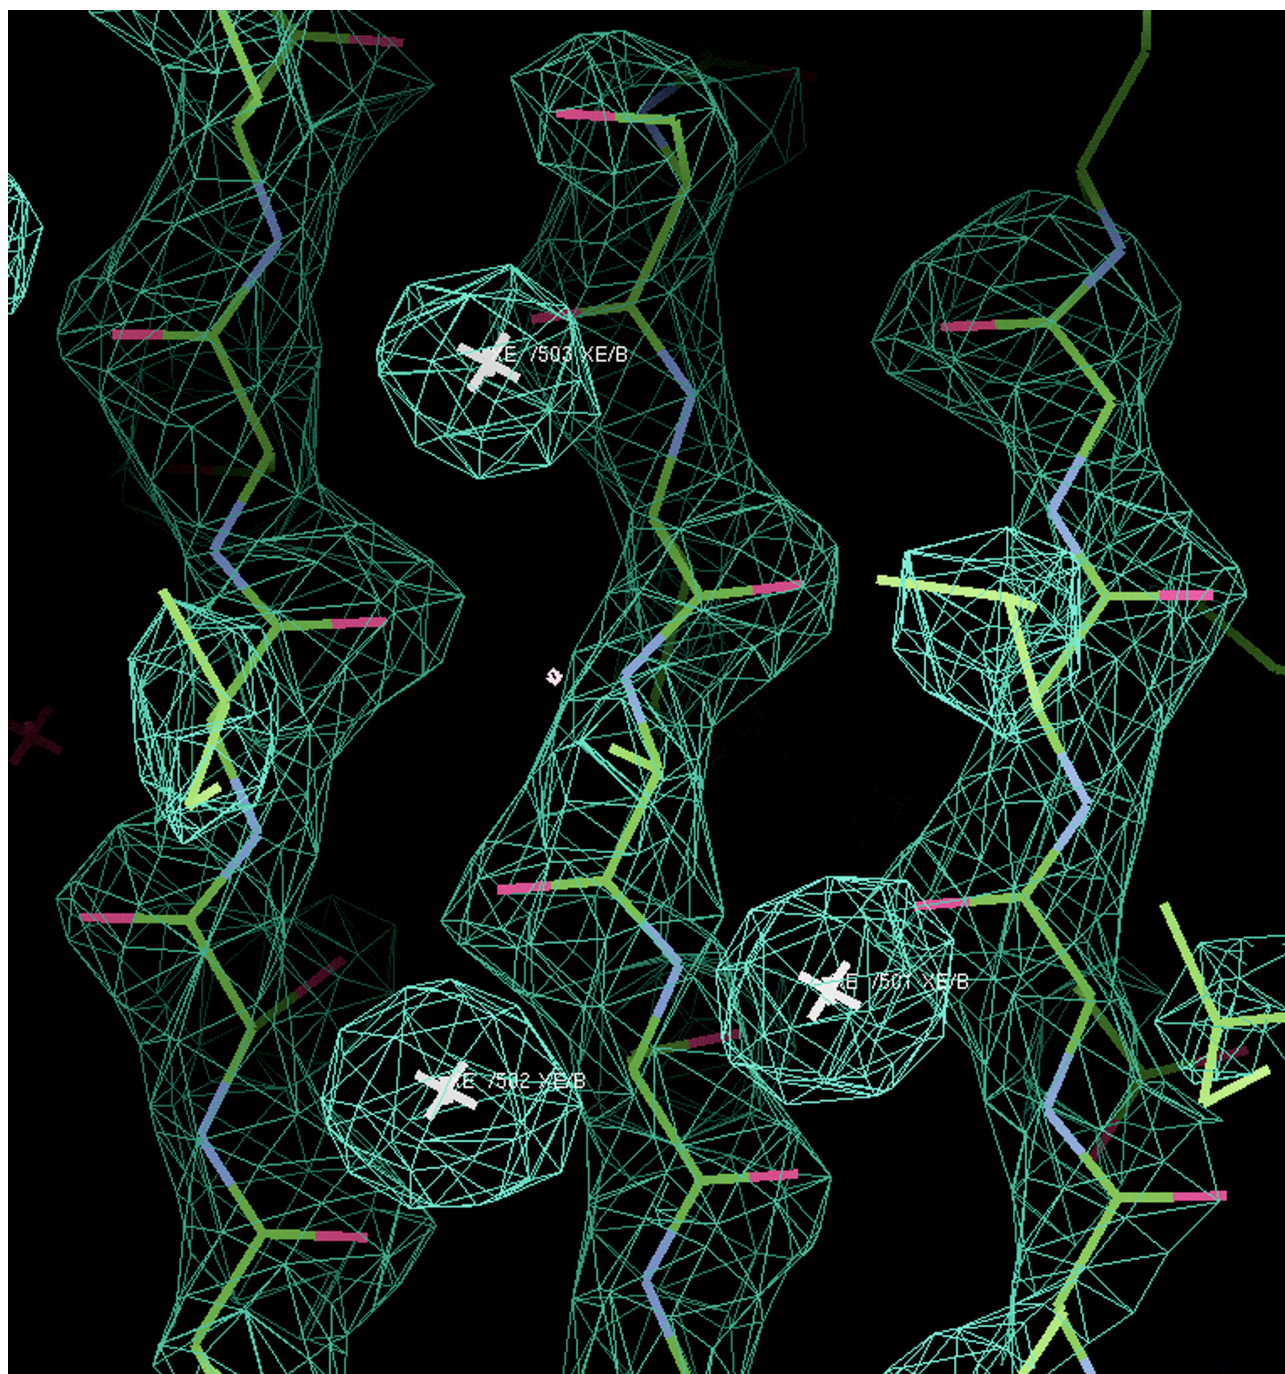

Supplement: pone.0184045.s006.pdf [file pone.0184045.s006.pdf]
