# Supplementary material for: Xenon for tunnelling analysis of the efflux pump component OprN
Source: PubMed Central journal article supplement (PMC5590881; doi:10.1371/journal.pone.0184045), 2017-09-08

S5 Fig **The xenon atom located at the level of the buoy domain.** Located in the wide hydrophobic patch of the tunnel.

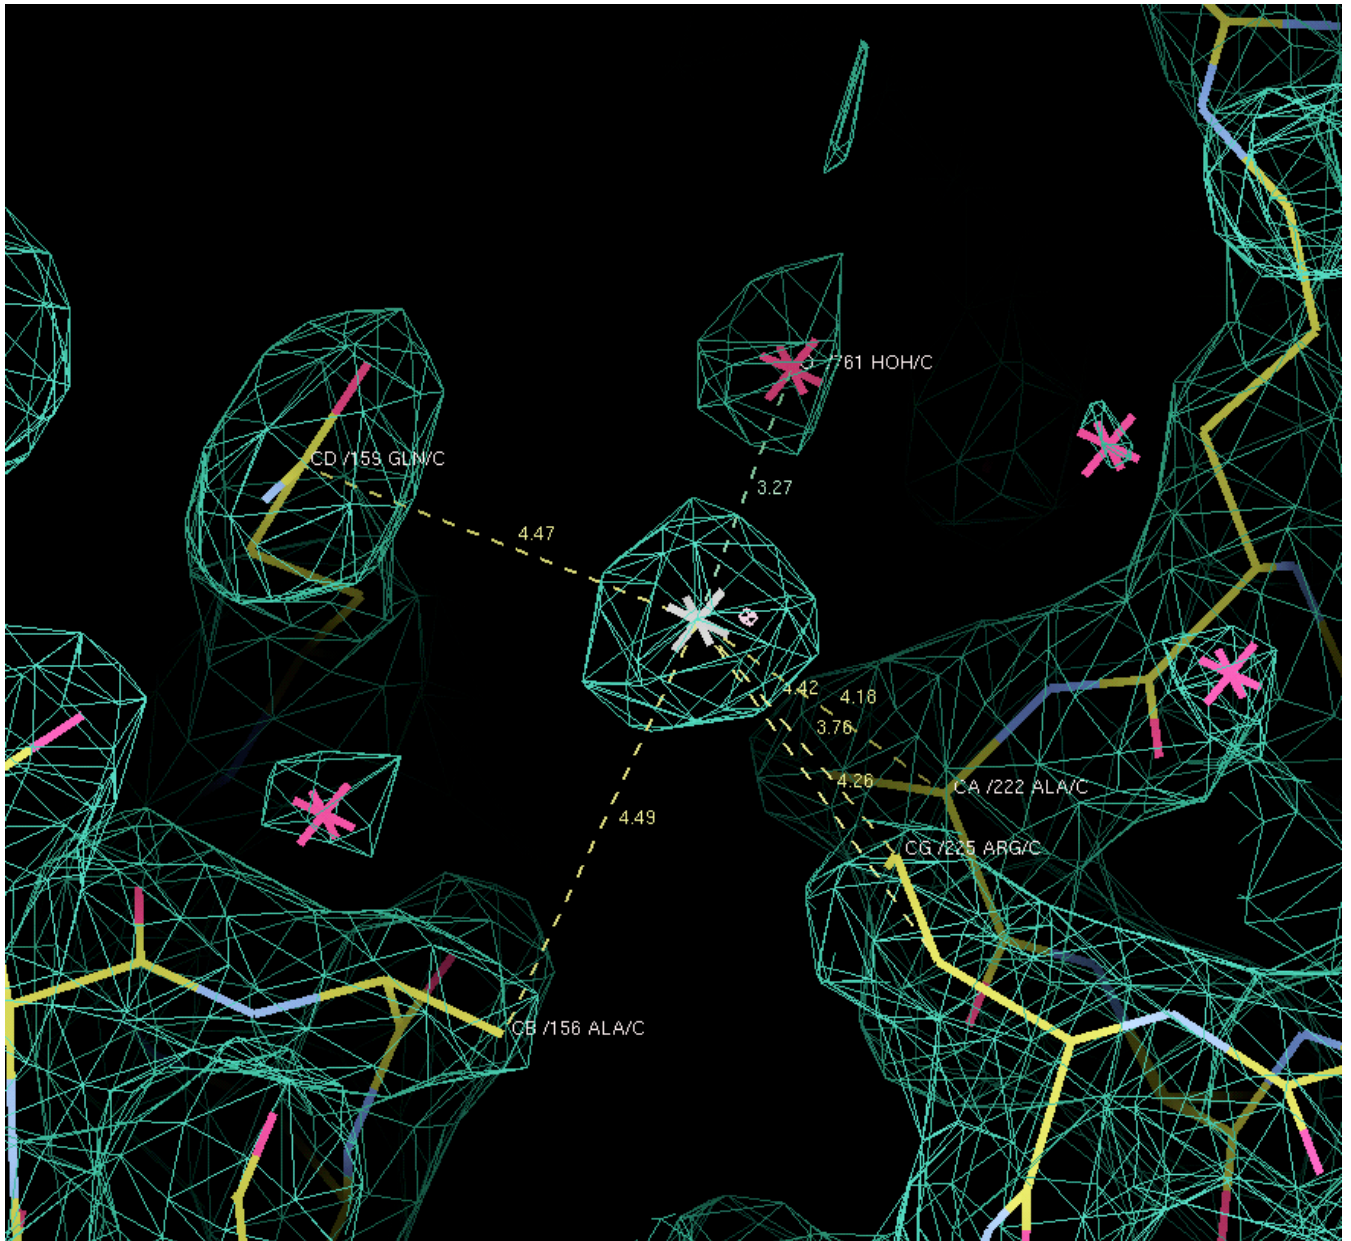

Supplement: pone.0184045.s007.pdf [file pone.0184045.s007.pdf]
